# 1 **Maintenance of fertility in the face of meiotic drive**

2 Lara Meade <sup>a\*</sup>, Sam Finnegan <sup>a</sup>, Ridhima Kad <sup>a</sup>, Kevin Fowler <sup>a</sup> & Andrew Pomiankowski <sup>a,b</sup>

3

4 <sup>a</sup> Department of Genetics, Evolution and Environment, University College London, Gower  
5 Street, London, WC1E 6BT, UK

6 <sup>b</sup> CoMPLEX, University College London, Gower Street, London, WC1E 6BT, UK

7

8 *Keywords:* accessory gland, multiple mating, sex ratio distorter, sperm competition, testis

9

10 *Word count:* 3200

11

12 *Online-only elements:* Appendix

13

14 ***Submitted to The American Naturalist as a Note.***

15 ***Second revision***

16 **Abstract**

17

18 Selfish genetic elements that gain a transmission advantage through the destruction of  
19 sperm have grave implications for drive male fertility. In the X-linked SR meiotic drive  
20 system of a stalk-eyed fly, we found that drive males have greatly enlarged testes and  
21 maintain high fertility despite the destruction of half their sperm, even when challenged  
22 with fertilising large numbers of females. Conversely, we observed reduced allocation of  
23 resources to the accessory glands that probably explains the lower mating frequency of SR  
24 males. Body size and eyespan were also reduced, which are likely to impair viability and pre-  
25 copulatory success. We discuss the potential evolutionary causes of these differences  
26 between drive and standard males.

## 27 Introduction

28

29 Meiotic drive genes gain a transmission advantage through manipulation of meiosis or  
30 gametogenesis and are likely to have profound ecological and evolutionary consequences,  
31 ranging from the evolution of sex determination systems and changes in karyotype, to  
32 impacts on population persistence and sexual selection (Hurst and Werren 2001; Jaenike  
33 2001; Werren 2011; Lindholm et al. 2016). Drivers have been uncovered in a wide range of  
34 taxa, with a preponderance of linkage to the sex chromosomes in the heterogametic sex  
35 (Hurst and Pomiankowski 1991; Jaenike 2001; Taylor and Ingvarsson 2003). When meiotic  
36 drive occurs in males, it severely disrupts the maturation and fertilisation capacity of non-  
37 carrier sperm, imposing a fertility disadvantage to organismal fitness (Price and Wedell  
38 2008) which is exaggerated under conditions of sperm competition (Taylor et al. 1999;  
39 Angelard et al. 2008; Price et al. 2008a) and typically has pleiotropic viability costs in both  
40 sexes (Burt and Trivers 2006).

41

42 The extent to which these and other detrimental effects of sperm-killer drive promote  
43 adaptive responses in the host species has received limited attention. There is an extensive  
44 literature on genetic elements that interfere and suppress the action of drive. For example,  
45 in *Drosophila* species, suppressors of X-linked drive have been found on the Y chromosome  
46 (Carvalho et al. 1997; Cazemajor et al. 1997; Branco et al. 2013) and throughout the rest of  
47 the genome (Carvalho and Klaczko 1993; Atlan et al. 2003; Tao et al. 2007). A more recent  
48 suggestion is that drive may promote the evolution of female polyandry in order to dilute  
49 the ejaculates of drive males (Haig and Bergstrom 1995; Zeh and Zeh 1997; Wedell 2013).

50 There is some evidence for this from experimental evolution studies using populations

51 exposed to meiotic drive in *D. pseudoobscura* (Price et al. 2008b) and *Mus musculus*  
52 (Manser et al. 2017), and from natural populations in which the rate of multiple mating  
53 correlates negatively with the frequency of drive in *D. pseudoobscura* (Price et al. 2014) and  
54 *D. neotestacea* (Pinzone and Dyer 2013). Female mate choice may additionally evolve in  
55 response to drive. In stalk-eyed flies, meiotic drive has been linked to small eyespan, which  
56 may allow females to avoid mating with carrier males through assessing eyespan (Wilkinson  
57 et al. 1998b; Cotton et al. 2014). Female house mice could avoid mating with drive males  
58 through detecting unique major histocompatibility alleles linked to the driving *t* complex  
59 (Silver 1985; Lindholm et al. 2013), although evidence remains unclear (Lindholm and Price  
60 2016).

61

62 Another, as yet unexplored, route by which males could adapt to drive is by increasing the  
63 allocation of resources to sperm production, to offset the destructive effect of drive on  
64 gametogenesis. Sperm number is positively correlated with testis size in many intra-specific  
65 studies (Gage 1994; Fry 2006; Hettyey and Roberts 2006) and increased testis size is a well  
66 characterised evolutionary response to heightened sperm competition favouring greater  
67 sperm production (Hosken and Ward 2001; Pitnick et al. 2001; Simmons and García-  
68 González 2008; Gay et al. 2009). The loss of sperm in drive males could be compensated for  
69 by increased investment in testis. Meiotic drive elements are typically found within  
70 inversions or other areas of low recombination that keep drive and insensitive responder  
71 loci together (Palopoli and Wu 1996; Johns et al. 2005; Dyer et al. 2007), facilitate the  
72 spread of modifiers that enhance transmission distortion (Hartl 1975; Larracuente and  
73 Presgraves 2012) and are predicted to be enriched for male beneficial sexually-antagonistic

74 alleles (Rydzewski et al. 2016). For similar reasons, alleles that enable compensatory  
75 investment in testes could become associated with the drive haplotype.

76

77 We test this idea using the Malaysian stalk-eyed fly species *Teleopsis dalmanni*. This species  
78 harbours SR, an X-linked driver, which produces strongly female-biased broods due to the  
79 destruction of Y-bearing sperm (Presgraves et al. 1997; Wilkinson and Sanchez 2001).

80 Meiotic drive arose around 2-3.5 Mya in the *Teleopsis* clade, and the X<sup>SR</sup> drive chromosome  
81 in *T. dalmanni* is estimated to have diverged from a non-driving ancestor (X<sup>ST</sup>) around 1 Mya

82 (Swallow et al. 2005; Paczolt et al. 2017), and is characterised by a large inversion(s)

83 covering most of the X chromosome (Johns et al. 2005; Paczolt et al. 2017). X<sup>SR</sup> is found at

84 appreciable frequencies (10 – 30%) across populations and generations (Wilkinson et al.

85 2003; Cotton et al. 2014) but appears to lack genetic suppressors (Reinhold et al. 1999;

86 Wolfenbarger and Wilkinson 2001; Paczolt et al. 2017). This means that there has been

87 ample time and opportunity for adaptive responses to selection to evolve in male carriers of

88 the drive chromosome.

89

90 We determined whether SR and standard (ST) males differed in their reproductive (testis

91 and accessory gland size) and morphological traits (eyespan and body size). Testis size

92 predicts the amount of sperm found within female storage (Fry 2006). Accessory glands

93 produce all non-sperm components of the ejaculate, and accessory gland size is positively

94 associated with male mating frequency (Baker et al. 2003; Rogers et al. 2005a, 2005b).

95 Body size and eyespan are also important predictors of male mating frequency (Wilkinson et

96 al. 1998a; Small et al. 2009; Cotton et al. 2010). We determined SR and ST sperm production

97 by mating them to low or high numbers of females over a 10-hour period, counting the

98 number of fertilized eggs produced. Males were also exposed to females over a short time  
99 period (30-minutes) to compare the copulation rate of SR and ST males.

100

## 101 **Methods**

102

103 Details of stock collection and day-to-day upkeep can be found in the Appendix.

104 Experimental males were taken from the SR-stock population in which males are a ~50:50

105 mix of  $X^{SR}$  and  $X^{ST}$  genotypes. Experimental females were taken from the ST-stock

106 population, which lacks meiotic drive. Single non-virgin males were allowed to mate freely

107 with either one or five virgin ST-stock females, over a period of 10 hours. Mated females

108 were allowed to lay eggs for 14 days, by which time most females had stopped laying fertile

109 eggs. Fecundity was recorded through egg counts, and egg hatch was used as an estimate

110 for fertility. On the following day, experimental males, and a similar number of unmated

111 males, were anaesthetised on ice and their testes and accessory glands were removed (fig.

112 1A) and photographed under differential interference contrast microscopy. Organ area was

113 measured at x50 magnification by tracing the outline. Male eyespan (Hingle et al. 2001) and

114 a proxy for body size, thorax length, (Rogers et al. 2008) were measured.

115

116 In a second experiment, SR-stock males were introduced to two ST-stock non-virgin females

117 at artificial dawn. All copulations were counted during 30 minutes. To minimise any effects

118 on mating frequency due to female choice, the experimental males were standardised to

119 have a narrow range of eyespan (7.5 – 8.5 mm).

120

121 Males from both experiments were genotyped using either two X-linked INDEL markers,  
122 *comp162710* and *cnv395*, or a microsatellite marker, *ms395*. Allele size of these markers  
123 reliably indicates the SR genotype of the males in our laboratory stocks (Meade et al. 2018).

124

125 *Statistical analysis*

126

127 We tested if male genotypes differed in their morphological (body size and eyespan; linear  
128 models) and reproductive traits (testis size and accessory gland size; linear mixed effects  
129 models). Differences in relative trait sizes between genotypes, as well as in absolute trait  
130 sizes (models where body size is excluded) are reported. The total number of fertile eggs  
131 (Poisson generalised linear mixed effects model (GLMM)) and proportion fertility (fertile  
132 eggs, non-fertile eggs; binomial GLMM) of females are compared when mated to SR (i.e.  
133 XSR/Y genotype) or ST (i.e. XST/Y genotype) males. We also tested if male reproductive  
134 traits, and their interaction with male genotype, were important predictors of fertility.  
135 Lastly, we tested whether SR and ST males differed in their mating frequency over 30-  
136 minutes by comparing the likelihood that SR and ST males mate at all (binomial GLMM), as  
137 well as the total number of copulations among males that mated at least once (Poisson  
138 GLMM).

139

140 To avoid collinearity of male morphological and reproductive traits with body size, models  
141 used residual values (Dormann et al. 2013). Where appropriate, experimental batch was  
142 included as a random effect. Further details and model effect sizes can be found in the  
143 Appendix.

144

145 **Results**

146

147 *SR trait size*

148

149 SR males had small body size (mean  $\pm$  s.e.  $2.290 \pm 0.013$  mm) compared to ST males ( $2.336 \pm$   
150  $0.009$  mm;  $F_{1,357} = 8.745$ ,  $P = 0.003$ ; fig. 1B). SR males also had small absolute (SR:  $8.048 \pm$   
151  $0.046$ mm; ST:  $8.402 \pm 0.031$ mm;  $F_{1,357} = 42.631$ ,  $P < 0.001$ ; fig. 1B) and relative eyespan  
152 ( $F_{1,355} = 0.713$ ,  $P = 0.016$ ), especially when body size was small (body size by genotype  
153 interaction  $F_{1,355} = 4.175$ ,  $P = 0.042$ ).

154

155 Despite their small body size, SR testis size was large ( $1.940 \pm 0.050$  mm<sup>2</sup>) compared to ST  
156 males ( $1.54 \pm 0.028$  mm<sup>2</sup>;  $F_{1,280.16} = 73.796$ ,  $P < 0.001$ ; fig. 1C). SR males also had large  
157 relative testis size ( $F_{1,282.78} = 99.982$ ,  $P < 0.001$ ). In contrast, SR males had small absolute (SR:  
158  $0.306 \pm 0.011$  mm<sup>2</sup>; ST:  $0.348 \pm 0.010$  mm<sup>2</sup>;  $F_{1,335.36} = 16.353$ ,  $P < 0.001$ ; fig. 1D) and relative  
159 accessory gland size ( $F_{1,334.03} = 7.801$ ,  $P = 0.006$ ). Taking relative values for each genotype,  
160 eyespan ( $F_{1,286} = 19.892$ ,  $P < 0.001$ ) and accessory gland size ( $F_{1,274.418} = 26.008$ ,  $P < 0.001$ )  
161 increased with testes size, but the rate was reduced in SR males (interaction eyespan:  $F_{1,286}$   
162  $= 5.261$ ,  $P = 0.023$ , fig. A1; interaction accessory glands:  $F_{1,268} = 8.375$ ,  $P = 0.004$ , fig. A2).

163

164 *SR fertility*

165

166 SR males did not differ from ST males in total (mean  $\pm$  s.e. SR:  $112.047 \pm 8.290$ , ST:  $107.053$   
167  $\pm 5.597$ ;  $\chi^2_1 = 2.416$ ,  $P = 0.120$ ,  $N = 215$ ; fig. 2A, 2B) or proportion fertility (SR:  $0.833 \pm 0.025$ ,  
168 ST:  $0.762 \pm 0.019$ ;  $\chi^2_1 = 2.469$ ,  $P = 0.116$ ,  $N = 215$ ) when kept with females over an extended



169 10-hour period. Males mating with five females achieved higher total fertility (one female:  
170  $79.231 \pm 5.090$ , five females:  $138.123 \pm 6.653$ ;  $\chi^2_1 = 43.698$ ,  $P < 0.001$ ,  $N = 215$ ) but a lower  
171 proportion fertility (one female:  $0.804 \pm 0.024$ , five females:  $0.763 \pm 0.199$ ;  $\chi^2_1 = 6.021$ ,  $P =$   
172  $0.014$ ,  $N = 215$ ) than those mating with a single female. The interaction between mating  
173 group (one or five females) and genotype did not influence total ( $\chi^2_1 = 0.591$ ,  $P = 0.442$ ,  $N =$   
174  $215$ ) or proportion fertility ( $\chi^2_1 = 1.377$ ,  $P = 0.241$ ,  $N = 215$ ).

175

176 Male testis size was an important predictor of fertility. Both total ( $\chi^2_1 = 5.897$ ,  $P = 0.015$ ,  $N =$   
177  $165$ ; fig. 2C, 2D) and proportion fertility ( $\chi^2_1 = 18.837$ ,  $P < 0.001$ ,  $N = 165$ ) were greater  
178 amongst males with larger testis size, even when accounting for male body size (total:  $\chi^2_1 =$   
179  $6.216$ ,  $P = 0.013$ ,  $N = 165$ ; proportion:  $\chi^2_1 = 16.646$ ,  $P < 0.001$ ,  $N = 165$ ). The addition of testis  
180 size did not alter the relationship between genotype and total ( $\chi^2_1 = 0.018$ ,  $P = 0.895$ ,  $N =$   
181  $173$ ) or proportion fertility ( $\chi^2_1 = 0.260$ ,  $P = 0.610$ ,  $N = 173$ ). There was no interaction  
182 between testis size and genotype predicting total ( $\chi^2_1 = 0.164$ ,  $P = 0.686$ ,  $N = 173$ ) or  
183 proportion fertility ( $\chi^2_1 = 0.617$ ,  $P = 0.432$ ,  $N = 173$ ). Accessory gland size did not predict  
184 total ( $\chi^2_1 = 0.032$ ,  $P = 0.858$ ,  $N = 165$ ) or proportion fertility ( $\chi^2_1 = 0.160$ ,  $P = 0.689$ ,  $N = 165$ ).

185

186 *SR mating frequency*

187

188 A total of 493 copulations from 193 males were observed over the 30-minute mating trials.  
189 SR males (mean  $\pm$  s.e.  $2.750 \pm 0.175$ ,  $N = 81$ ) copulated fewer times on average than ST  
190 males ( $3.550 \pm 0.186$ ,  $N = 76$ ;  $\chi^2_1 = 6.304$ ,  $P = 0.012$ ; fig. 1E), but were not less likely to mate  
191 at least once (SR: 81/104, ST: 76/89;  $\chi^2_1 = 1.665$ ,  $P = 0.197$ ,  $N = 193$ ).

192

193 **Discussion**

194

195 One of the main features of drive in males is reduced sperm production due to the  
196 dysfunction of non-carrier sperm. This has been reported to cause a loss in fertility in a  
197 variety of species including *Drosophila* (Hartl et al. 1967; Jaenike 1996; Angelard et al. 2008;  
198 Price et al. 2012; Pinzone and Dyer 2013), house mice (Carroll et al. 2004), and *Silene alba*  
199 (Taylor et al. 1999). Here, we present evidence that SR males in *T. dalmanni* overcome this  
200 deficit by having greatly enlarged testes. SR males carry an extreme form of the X<sup>SR</sup> drive  
201 chromosome, siring female-only broods due to the dysfunction of Y-bearing gametes.  
202 Despite gamete loss, SR males achieve fertility at a level equivalent to that of ST males, both  
203 when exposed to a single female or 5 females over a 10-hour period (fig. 2). Our results  
204 contradict a previous study which found an SR fertility deficit using a similar design  
205 (Wilkinson et al. 2006). But this study measured fertility as the number of adults that  
206 eclosed, compounding fertility with egg-to-adult survival. Recent work shows larval survival  
207 is reduced in drive heterozygous females (Finnegan et al. 2019), which could account for the  
208 drop in SR male fertility. The patterns in *T. dalmanni* are in contrast to other insect species  
209 with X-linked meiotic drive which generally show a deficiency in fertility of drive males  
210 either after a single or multiple matings (Jaenike 1996; Atlan et al. 2004; Angelard et al.  
211 2008; Price et al. 2012; Pinzone and Dyer 2013).

212

213 These experiments were designed to test whether daily sperm reserves differ between SR  
214 and ST males, not to replicate normal levels of mating observed under natural conditions  
215 which occur at far lower rates (Cotton et al. 2015). On dissection, we discovered that SR  
216 males have greatly enlarged testes (fig. 1C), about 26% larger than ST males. This difference

217 remained after controlling for body size (fig. 1C). Our interpretation is that the increase in  
218 testis size allowed SR males to compensate for the loss of sperm due to the action of  
219 meiotic drive. This is supported by the finding that fertility increased with increasing testis  
220 size, both for absolute and relative testis size, in both SR and ST males (fig. 2). Our  
221 interpretation also aligns with previous findings that SR male ejaculates deliver similar  
222 numbers of sperm as ST males, after single and multiple matings (Meade et al. 2018).  
223 Despite the destruction of half their sperm, the increased investment in SR testis size (i.e.  
224 sperm production) allows them to deliver sufficient sperm to achieve similar fertility as ST  
225 males. To further understand the extent of this compensation, we need to assess SR male  
226 success under sperm competition, which is the norm in *T. dalmanni* (Wilkinson et al. 1998a;  
227 Baker et al. 2001; Corley et al. 2006). Previous work suggests that SR males perform poorly  
228 under sperm competition (Wilkinson et al. 2006) but this assessment again does not take  
229 account of the lower egg-to-adult viability of  $X^{SR}$  carriers (Finnegan et al. 2019) which could  
230 simulate an advantage of ST males in sperm competition. In our experimental design,  
231 autosomal background was standardised across SR and ST males. So, it seems likely that  
232 control of testis size is linked to alleles that are located in the  $X^{SR}$  chromosomal inversion  
233 and that such alleles arose as an adaptive response to sperm dysfunction caused by drive,  
234 but further investigation is needed to establish this view.

235

236 We found morphological trait divergence in accessory gland size, which are small in SR  
237 males, even after controlling for body size (fig. 1D). Previous work in *T. dalmanni* shows that  
238 accessory gland size is linked with the mating rate (Baker et al. 2003; Rogers et al. 2005a).  
239 This might explain why the mating frequency of SR males was low, being about 75% of the  
240 rate for ST males over a 30-minute period (fig. 1E). In addition, SR males have small body

241 size and small eyespan for their body size (fig. 1), traits likely to reduce male mating success,  
242 both in male-male agonistic interactions (Panhuis and Wilkinson 1999; Small et al. 2009) and  
243 in attracting and mating with females (Wilkinson and Reillo 1994; Hingle et al. 2001; Cotton  
244 et al. 2010). The increased allocation of resources to testes in SR males potentially causes a  
245 reduction in the resources available for investment in accessory glands, as both traits  
246 develop over several weeks post-eclosion (Baker et al. 2003; Rogers et al. 2008). Resource  
247 competition with testes is not an obvious reason for reduced body size and eyespan which  
248 are determined during larval development. However, expression of these traits might be  
249 connected via juvenile hormone which has been shown to mediate a trade-off between  
250 eyespan and testes in stalk-eyed flies (Fry 2006).

251

252 Small body size and eyespan are also likely to arise from the low genetic condition of drive  
253 males. The *T. dalmanni* SR inversion(s) covers nearly all of the X chromosome, capturing one  
254 third of the stalk-eyed fly genome (Johns et al. 2005; Paczolt et al. 2017).  $X^{SR}$  alleles will be  
255 subject to weak natural selection due to reduced recombination and liable to accumulate  
256 deleterious mutational effects (Kirkpatrick 2010). Consistent with a lack of recombination,  
257 there are 955 fixed sequence differences between transcripts linked to  $X^{SR}$  and  $X^{ST}$   
258 (Reinhardt et al. 2014). Such mutations are expected to have a negative effect on costly,  
259 condition-dependent traits, such as body size and eyespan, whose expression is affected by  
260 multiple loci distributed throughout the genome (David et al. 2000; Cotton et al. 2004;  
261 Bellamy et al. 2013). Given SR males have small eyespan, they will be unattractive and gain  
262 fewer mating opportunities. Consequently, investment in accessory glands which enable  
263 higher mating rates will give lower returns than the diversion of resources into larger testes  
264 which allow SR males to produce ejaculates of equivalent size to those of ST males, and be

265 able to compete under the conditions of high sperm competition seen in stalk-eyed flies.

266 These ideas about linking resource allocation, condition and mating rates need further

267 investigation, in particular under the mating conditions that occur in the wild.

268

269 Here we demonstrate for the first time that through investment in testis, drive males can

270 maintain fertility, despite sperm destruction. Other responses to drive, such as genetic

271 suppression, polyandry and female choice, reduce the transmission advantage gained by

272 drive, and lead to reductions in the equilibrium frequency of drive (Hartl 1975; Taylor and

273 Jaenike 2002; Holman et al. 2015). In sharp contrast, increased investment in sperm

274 production intensifies the transmission of drive, because the fertility gain to the individual

275 male is also beneficial to the drive element itself. Such an association with meiotic drive has

276 neither been theoretically modelled nor empirically studied previously, but has implications

277 for the spread and equilibrium frequency of drive in natural populations.

278 **Authors' contributions**

279 All authors contributed to conceiving the project and methodology; LM and RK collected  
280 data on fertility and morphology; SF collected data on mating frequency; LM analysed the  
281 data; LM, KF and AP led the writing of the manuscript. All authors contributed critically to  
282 the drafts and gave final approval for publication.

283

284 **Acknowledgements**

285 Funding was provided by a NERC Studentship held by LM, and by EPSRC (EP/F500351/1,  
286 EP/I017909/1) awards to AP and NERC grants (NE/G00563X/1, NE/R010579/1) to KF and AP.

287

288 **Data accessibility**

289 Data will be uploaded to the Dryad Digital Repository

290

291 **Ethical statement**

292 No ethical approval was required for this research

293 **Literature cited**

294

295 Angelard, C., C. Montchamp-Moreau, and D. Joly. 2008. Female-driven mechanisms,  
296 ejaculate size and quality contribute to the lower fertility of sex-ratio distorter males in  
297 *Drosophila simulans*. BMC Evolutionary Biology 8:326.

298 Atlan, A., C. Capillon, N. Derome, D. Couvet, and C. Montchamp-Moreau. 2003. The  
299 evolution of autosomal suppressors of sex-ratio drive in *Drosophila simulans*. Genetica  
300 117:47–58.

301 Atlan, A., D. Joly, C. Capillon, and C. Montchamp-Moreau. 2004. *Sex-ratio* distorter of  
302 *Drosophila simulans* reduces male productivity and sperm competition ability. Journal  
303 of Evolutionary Biology 17:744–751.

304 Baker, R. H., R. Ashwell, T. Richards, K. Fowler, T. Chapman, and A. Pomiankowski. 2001.  
305 Effects of multiple mating and male eye span on female reproductive output in the  
306 stalk-eyed fly, *Cyrtodiopsis dalmanni*. Behavioral Ecology 12:732–739.

307 Baker, R. H., M. Denniff, P. Futerman, K. Fowler, A. Pomiankowski, and T. Chapman. 2003.  
308 Accessory gland size influences time to sexual maturity and mating frequency in the  
309 stalk-eyed fly, *Cyrtodiopsis dalmanni*. Behavioral Ecology 14:607–611.

310 Bellamy, L., N. Chapman, K. Fowler, and A. Pomiankowski. 2013. Sexual traits are sensitive  
311 to genetic stress and predict extinction risk in the stalk-eyed fly, *Diasemopsis meigenii*.  
312 Evolution 67:2662–2673.

313 Branco, A. T., Y. Tao, D. L. Hartl, and B. Lemos. 2013. Natural variation of the Y chromosome  
314 suppresses sex ratio distortion and modulates testis-specific gene expression in  
315 *Drosophila simulans*. Heredity 111:8–15.

316 Burt, A., and R. Trivers. 2006. Genes in Conflict: The biology of selfish genetic elements.

- 317 Cambridge, MA: BelknapHarvard. Harvard University Press, Cambridge, CA, CA.
- 318 Carroll, L. S., S. Meagher, L. Morrison, D. J. Penn, and W. K. Potts. 2004. Fitness effects of a  
319 selfish gene (the *Mus t* complex) are revealed in an ecological context. *Evolution*  
320 58:1318–1328.
- 321 Carvalho, A. B., and L. B. Klaczko. 1993. Autosomal suppressors of sex-ratio in *Drosophila*  
322 *mediopunctata*. *Heredity* 71:546–551.
- 323 Carvalho, A. B., S. C. Vaz, and L. B. Klaczko. 1997. Polymorphism for Y-linked suppressors of  
324 sex-ratio in two natural populations of *Drosophila mediopunctata*. *Genetics* 146:891–  
325 902.
- 326 Cazemajor, M., C. Landré, and C. Montchamp-Moreau. 1997. The Sex-Ratio trait in  
327 *Drosophila simulans*: Genetic analysis of distortion and suppression. *Genetics* 147:635–  
328 642.
- 329 Corley, L. S., S. Cotton, E. McConnell, T. Chapman, K. Fowler, and A. Pomiankowski. 2006.  
330 Highly variable sperm precedence in the stalk-eyed fly, *Teleopsis dalmanni*. *BMC*  
331 *Evolutionary Biology* 6:53.
- 332 Cotton, A. J., S. Cotton, J. Small, and A. Pomiankowski. 2015. Male mate preference for  
333 female eyespan and fecundity in the stalk-eyed fly, *Teleopsis dalmanni*. *Behavioral*  
334 *Ecology* 26:376–385.
- 335 Cotton, A. J., M. Földvári, S. Cotton, and A. Pomiankowski. 2014. Male eyespan size is  
336 associated with meiotic drive in wild stalk-eyed flies (*Teleopsis dalmanni*). *Heredity*  
337 112:363–9.
- 338 Cotton, S., K. Fowler, and A. Pomiankowski. 2004. Condition dependence of sexual  
339 ornament size and variation in the stalk-eyed fly *Cyrtodiopsis dalmanni* (Diptera:  
340 Diopsidae). *Evolution* 58:1038–46.



- 341 Cotton, S., J. Small, R. Hashim, and A. Pomiankowski. 2010. Eyespan reflects reproductive  
342 quality in wild stalk-eyed flies. *Evolutionary Ecology* 24:83–95.
- 343 David, P., T. Bjorksten, K. Fowler, and A. Pomiankowski. 2000. Condition-dependent  
344 signalling of genetic variation in stalk-eyed flies. *Nature* 406:186–188.
- 345 Dormann, C. F., J. Elith, S. Bacher, C. Buchmann, G. Carl, G. Carré, J. R. G. Marquéz, et al.  
346 2013. Collinearity: A review of methods to deal with it and a simulation study  
347 evaluating their performance. *Ecography* 36:027–046.
- 348 Dyer, K. A., B. Charlesworth, and J. Jaenike. 2007. Chromosome-wide linkage disequilibrium  
349 as a consequence of meiotic drive. *Proceedings of the National Academy of Sciences*  
350 104:1587–1592.
- 351 Finnegan, S. R., N. J. White, D. Koh, M. F. Camus, K. Fowler, and A. Pomiankowski. 2019.  
352 Meiotic drive reduces egg-to-adult viability in stalk-eyed flies. bioRxiv 690321.
- 353 Fry, C. L. 2006. Juvenile hormone mediates a trade-off between primary and secondary  
354 sexual traits in stalk-eyed flies. *Evolution and Development* 8:191–201.
- 355 Gage, M. J. G. 1994. Associations between body size, mating pattern, testis size and sperm  
356 lengths across butterflies. *Proceedings of the Royal Society B: Biological Sciences*  
357 258:247–254.
- 358 Gay, L., D. J. Hosken, R. Vasudev, T. Tregenza, and P. E. Eady. 2009. Sperm competition and  
359 maternal effects differentially influence testis and sperm size in *Callosobruchus*  
360 *maculatus*. *Journal of Evolutionary Biology* 22:1143–1150.
- 361 Haig, D., and C. T. Bergstrom. 1995. Multiple mating, sperm competition and meiotic drive.  
362 *Journal of Evolutionary Biology* 8:265–282.
- 363 Hartl, D. L. 1975. Modifier theory and meiotic drive. *Theoretical Population Biology* 7:168–  
364 174.

- 365 Hartl, D. L., Y. Hiraizumi, and J. Crow. 1967. Evidence for sperm dysfunction as the  
366 mechanism of segregation distortion in *Drosophila melanogaster*. *Genetics* 58:2240–  
367 2245.
- 368 Hettyey, A., and J. D. Roberts. 2006. Sperm traits of the quacking frog, *Crinia georgiana*:  
369 Intra- and interpopulation variation in a species with a high risk of sperm competition.  
370 *Behavioral Ecology and Sociobiology* 59:389–396.
- 371 Hingle, A., K. Fowler, and A. Pomiankowski. 2001. The effect of transient food stress on  
372 female mate preference in the stalk-eyed fly *Cyrtodiopsis dalmanni*. *Proceedings of the*  
373 *Royal Society B: Biological Sciences* 268:1239–1244.
- 374 Holman, L., T. A. R. Price, N. Wedell, and H. Kokko. 2015. Coevolutionary dynamics of  
375 polyandry and sex-linked meiotic drive. *Evolution* 69:709–720.
- 376 Hosken, D. J., and P. I. Ward. 2001. Experimental evidence for testis size evolution via sperm  
377 competition. *Ecology Letters* 4:10–13.
- 378 Hurst, G. D. D., and J. H. Werren. 2001. The role of selfish genetic elements in eukaryotic  
379 evolution. *Nature Reviews Genetics* 2:597–606.
- 380 Hurst, L. D., and A. Pomiankowski. 1991. Causes of sex ratio bias may account for unisexual  
381 sterility in hybrids: A new explanation of Haldane’s rule and related phenomena.  
382 *Genetics* 128:841–858.
- 383 Jaenike, J. 1996. Sex-Ratio meiotic drive in the *Drosophila quinaria* group. *The American*  
384 *Naturalist* 148:237–254.
- 385 ———. 2001. Sex chromosome meiotic drive. *Annual Review of Ecology and Systematics*  
386 32:25–49.
- 387 Johns, P. M., L. L. Wolfenbarger, and G. S. Wilkinson. 2005. Genetic linkage between a  
388 sexually selected trait and X chromosome meiotic drive. *Proceedings of the Royal*

- 389 Society B: Biological Sciences 272:2097–2103.
- 390 Kirkpatrick, M. 2010. How and why chromosome inversions evolve. *PLoS Biology*
- 391 8:e1000501.
- 392 Larracuente, A. M., and D. C. Presgraves. 2012. The selfish *Segregation Distorter* gene
- 393 complex of *Drosophila melanogaster*. *Genetics* 192:33–53.
- 394 Lindholm, A. K., K. A. Dyer, R. C. Firman, L. Fishman, W. Forstmeier, L. Holman, H.
- 395 Johannesson, et al. 2016. The ecology and evolutionary dynamics of meiotic drive.
- 396 *Trends in Ecology & Evolution* 31:315–326.
- 397 Lindholm, A. K., K. Musolf, A. Weidt, and B. König. 2013. Mate choice for genetic
- 398 compatibility in the house mouse. *Ecology and Evolution* 3:1231–1247.
- 399 Lindholm, A. K., and T. A. R. Price. 2016. The evolutionary consequences of selfish genetic
- 400 elements. *Current Zoology* 62:655–658.
- 401 Manser, A., A. K. Lindholm, L. W. Simmons, and R. C. Firman. 2017. Sperm competition
- 402 suppresses gene drive among experimentally evolving populations of house mice.
- 403 *Molecular Ecology* 5784–5792.
- 404 Meade, L. C., D. Dinneen, R. Kad, D. M. Lynch, K. Fowler, and A. Pomiankowski. 2018.
- 405 Ejaculate sperm number compensation in stalk-eyed flies carrying a selfish meiotic
- 406 drive element. *Heredity*.
- 407 Paczolt, K. A., J. A. Reinhardt, and G. S. Wilkinson. 2017. Contrasting patterns of X-
- 408 chromosome divergence underlie multiple sex-ratio polymorphisms in stalk-eyed flies.
- 409 *Journal of Evolutionary Biology* 30:1772–1784.
- 410 Palopoli, M. F., and C. I. Wu. 1996. Rapid evolution of a coadapted gene complex: evidence
- 411 from the *Segregation Distorter* (SD) system of meiotic drive in *Drosophila*
- 412 *melanogaster*. *Genetics* 143:1675–88.

- 413 Panhuis, T. M., and G. S. Wilkinson. 1999. Exaggerated male eye span influences contest  
414 outcome in stalk-eyed flies (Diopsidae). *Behavioral Ecology and Sociobiology* 46:221–  
415 227.
- 416 Pinzone, C. A., and K. A. Dyer. 2013. Association of polyandry and sex-ratio drive prevalence  
417 in natural populations of *Drosophila neotestacea*. *Proceedings of the Royal Society B:*  
418 *Biological Sciences* 280:20131397.
- 419 Pitnick, S., G. T. Miller, J. Reagan, and B. Holland. 2001. Males' evolutionary responses to  
420 experimental removal of sexual selection. *Proceedings of the Royal Society B: Biological*  
421 *Sciences* 268:1071–1080.
- 422 Presgraves, D. C., E. Severance, and G. S. Wilkinson. 1997. Sex chromosome meiotic drive in  
423 stalk-eyed flies. *Genetics* 147:1169–80.
- 424 Price, T. A. R., A. J. Bretman, T. D. Avent, R. R. Snook, G. D. D. Hurst, and N. Wedell. 2008*a*.  
425 Sex ratio distorter reduces sperm competitive ability in an insect. *Evolution* 62:1644–  
426 1652.
- 427 Price, T. A. R., A. J. Bretman, A. C. Gradilla, J. Reger, M. L. Taylor, P. Giraldo-Perez, A.  
428 Campbell, et al. 2014. Does polyandry control population sex ratio via regulation of a  
429 selfish gene? *Proceedings of the Royal Society B: Biological Sciences* 281:20133259.
- 430 Price, T. A. R., D. J. Hodgson, Z. Lewis, G. D. D. Hurst, and N. Wedell. 2008*b*. Selfish genetic  
431 elements promote polyandry in a fly. *Science* 322:1241–1243.
- 432 Price, T. A. R., R. C. Hoskyns, H. Rapley, J. C. Evans, and N. Wedell. 2012. No evidence that  
433 temperature-related fertility differences influence the distribution of a selfish genetic  
434 element. *Functional Ecology* 26:657–665.
- 435 Price, T. A. R., and N. Wedell. 2008. Selfish genetic elements and sexual selection: Their  
436 impact on male fertility. *Genetica* 134:99–111.

- 437 Reinhold, K., L. Engqvist, B. Misof, and J. Kurtz. 1999. Meiotic drive and evolution of female  
438 choice. *Proceedings of the Royal Society B: Biological Sciences* 266:1341–1345.
- 439 Rogers, D. W., R. H. Baker, T. Chapman, M. Denniff, A. Pomiankowski, and K. Fowler. 2005a.  
440 Direct and correlated responses to artificial selection on male mating frequency in the  
441 stalk-eyed fly *Cyrtodiopsis dalmanni*. *Journal of Evolutionary Biology* 18:642–650.
- 442 Rogers, D. W., T. Chapman, K. Fowler, and A. Pomiankowski. 2005b. Mating-induced  
443 reduction in accessory reproductive organ size in the stalk-eyed fly *Cyrtodiopsis*  
444 *dalmanni*. *BMC Evolutionary Biology* 5:37.
- 445 Rogers, D. W., M. Denniff, T. Chapman, K. Fowler, and A. Pomiankowski. 2008. Male sexual  
446 ornament size is positively associated with reproductive morphology and enhanced  
447 fertility in the stalk-eyed fly *Teleopsis dalmanni*. *BMC Evolutionary Biology* 8.
- 448 Rydzewski, W. T., S. A. Carioscia, G. Liévano, V. D. Lynch, and M. M. Patten. 2016. Sexual  
449 antagonism and meiotic drive cause stable linkage disequilibrium and favour reduced  
450 recombination on the X chromosome. *Journal of Evolutionary Biology* 29:1247–1256.
- 451 Silver, L. M. 1985. Mouse *t* haplotypes. *Annual Review of Genetics* 19:179–208.
- 452 Simmons, L. W., and F. García-González. 2008. Evolutionary reduction in testes size and  
453 competitive fertilization success in response to the experimental removal of sexual  
454 selection in dung beetles. *Evolution* 62:2580–2591.
- 455 Small, J., S. Cotton, K. Fowler, and A. Pomiankowski. 2009. Male eyespan and resource  
456 ownership affect contest outcome in the stalk-eyed fly, *Teleopsis dalmanni*. *Animal*  
457 *Behaviour* 78:1213–1220.
- 458 Swallow, J. G., L. E. Wallace, S. J. Christianson, P. M. Johns, and G. S. Wilkinson. 2005.  
459 Genetic divergence does not predict change in ornament expression among  
460 populations of stalk-eyed flies. *Molecular Ecology* 14:3787–3800.

- 461 Tao, Y., J. P. Masly, L. Araripe, Y. Ke, and D. L. Hartl. 2007. A *sex-ratio* meiotic drive system in  
462 *Drosophila simulans*. I: An autosomal suppressor. PLoS Biology 5:e292.
- 463 Taylor, D. R., and P. K. Ingvarsson. 2003. Common features of segregation distortion in  
464 plants and animals. Genetica 117:27–35.
- 465 Taylor, D. R., M. J. Saur, and E. Adams. 1999. Pollen performance and sex-ratio evolution in a  
466 dioecious plant. Evolution 53:1028–1036.
- 467 Taylor, J. E., and J. Jaenike. 2002. Sperm competition and the dynamics of X chromosome  
468 drive: Stability and extinction. Genetics 160:1721–1731.
- 469 Wedell, N. 2013. The dynamic relationship between polyandry and selfish genetic elements.  
470 Philosophical Transactions of the Royal Society B: Biological Sciences 368:20120049.
- 471 Werren, J. H. 2011. Selfish genetic elements, genetic conflict, and evolutionary innovation.  
472 Proceedings of the National Academy of Sciences of the United States of America  
473 108:10863–10870.
- 474 Wilkinson, G. S., P. M. Johns, E. S. Kelleher, M. L. Muscedere, and A. Lorsong. 2006. Fitness  
475 effects of X chromosome drive in the stalk-eyed fly, *Cyrtodiopsis dalmanni*. Journal of  
476 Evolutionary Biology 19:1851–1860.
- 477 Wilkinson, G. S., H. Kahler, and R. H. Baker. 1998a. Evolution of female mating preferences  
478 in stalk-eyed flies. Behavioral Ecology 9:525–533.
- 479 Wilkinson, G. S., D. C. Presgraves, and L. Crymes. 1998b. Male eye span in stalk-eyed flies  
480 indicates genetic quality by meiotic drive suppression. Nature 391:276–279.
- 481 Wilkinson, G. S., and P. R. Reillo. 1994. Female choice response to artificial selection on an  
482 exaggerated male trait in a stalk-eyed fly. Proceedings of the Royal Society B: Biological  
483 Sciences 255:1–6.
- 484 Wilkinson, G. S., and M. I. Sanchez. 2001. Sperm development, age and sex chromosome

- 485           meiotic drive in the stalk-eyed fly, *Cyrtodiopsis whitei*. *Heredity* 87:17–24.
- 486   Wilkinson, G. S., J. G. Swallow, S. J. Christianson, and K. Madden. 2003. Phylogeography of  
487           sex ratio and multiple mating in stalk-eyed flies from southeast Asia. *Genetica* 117:37–  
488           46.
- 489   Wolfenbarger, L. L., and G. S. Wilkinson. 2001. Sex-linked expression of a sexually selected  
490           trait in the stalk-eyed fly, *Cyrtodiopsis dalmanni*. *Evolution* 55:103–110.
- 491   Zeh, J. A., and D. W. Zeh. 1997. The evolution of polyandry II: Post-copulatory defenses  
492           against genetic incompatibility. *Proceedings of the Royal Society B: Biological Sciences*  
493           264:69–75.
- 494

495 **Figures**

496

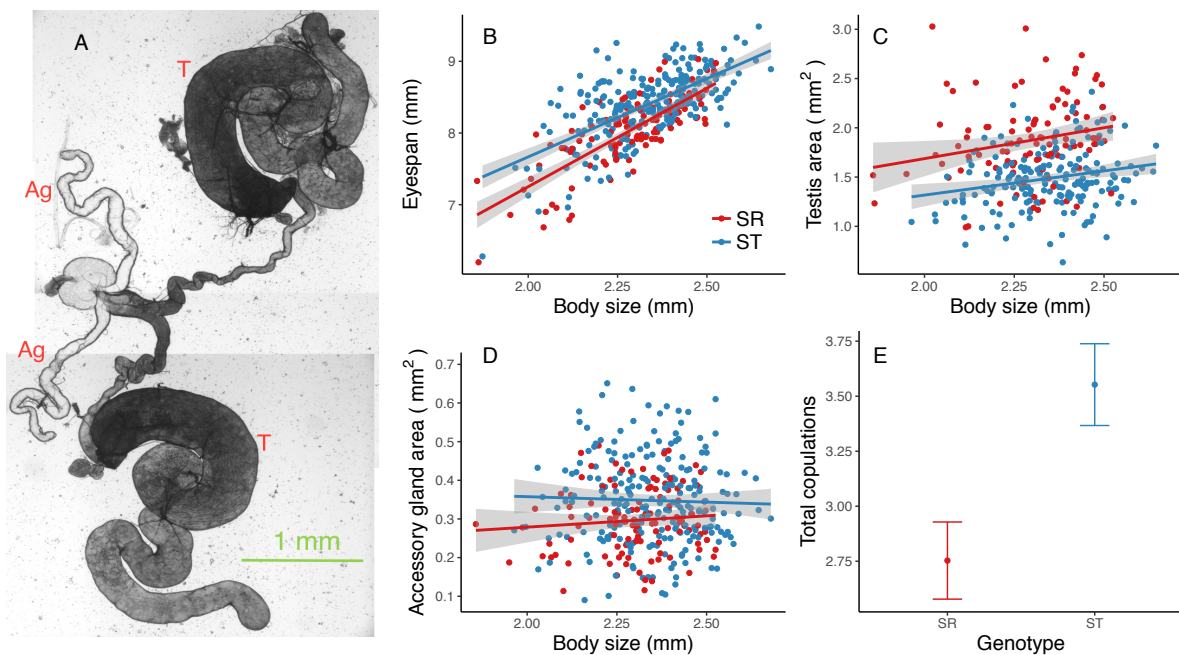

497

498 **Figure 1**

499 A, testes (T) and accessory glands (Ag) after dissection. B–D, male morphological and  
500 reproductive trait size for SR (red) and ST (blue) males, plotted against male body size. B,  
501 male eyespan. C, male testis area. D, male accessory gland area. SR males have smaller body  
502 size, eyespan and accessory gland size, but larger testis size. Grey shading shows  $\pm$  s.e. E,  
503 mating frequency, measured as total number of copulations (mean  $\pm$  s.e.) observed over 30  
504 minutes.



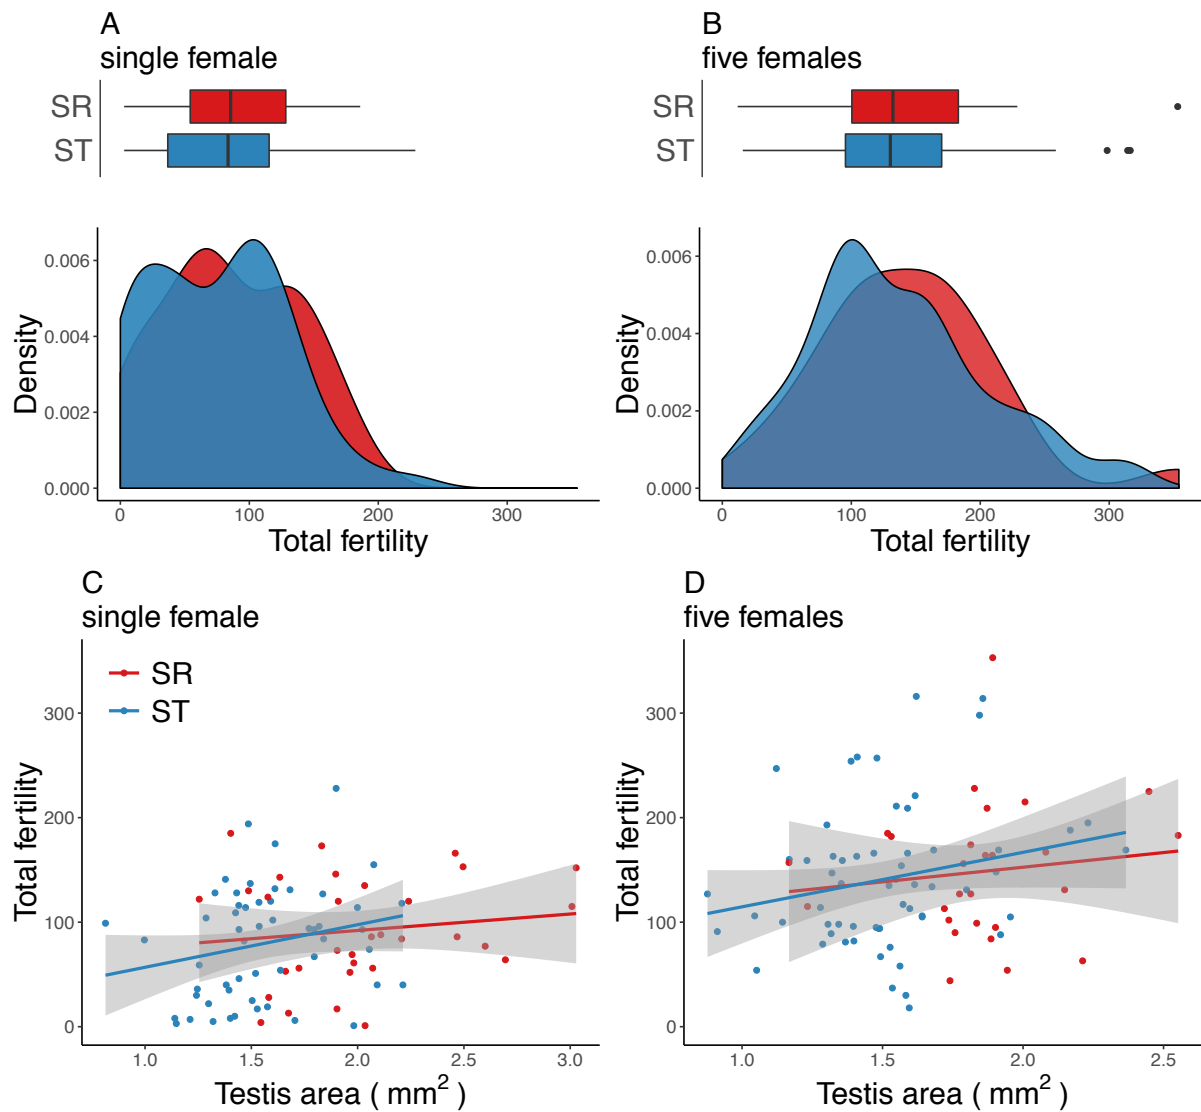

505

506 **Figure 2**

507 *A–B, upper: box plots (median and interquartile range) and lower: Kernel probability density*

508 *of measures of total fertility of SR (red) and ST (blue) males. A, mated to a single female. B,*

509 *mated to five females. Across both mating regimes, SR and ST males did not differ in the*

510 *number of eggs fertilised. C–D, absolute testis area plotted against total fertility. C, mated to*

511 *a single female. D, mated to five females. Across both mating regimes, total fertility*

512 *increased with testis area in SR and ST males. Grey shading shows  $\pm$  s.e.*
